# Supplementary material for: Circulating DNA as prognostic biomarker in patients with advanced hepatocellular carcinoma: a translational exploratory study from the SORAMIC trial
Source: PubMed Central journal article supplement (PMC6771167; doi:10.1186/s12967-019-2079-9), 2019-10-01

A

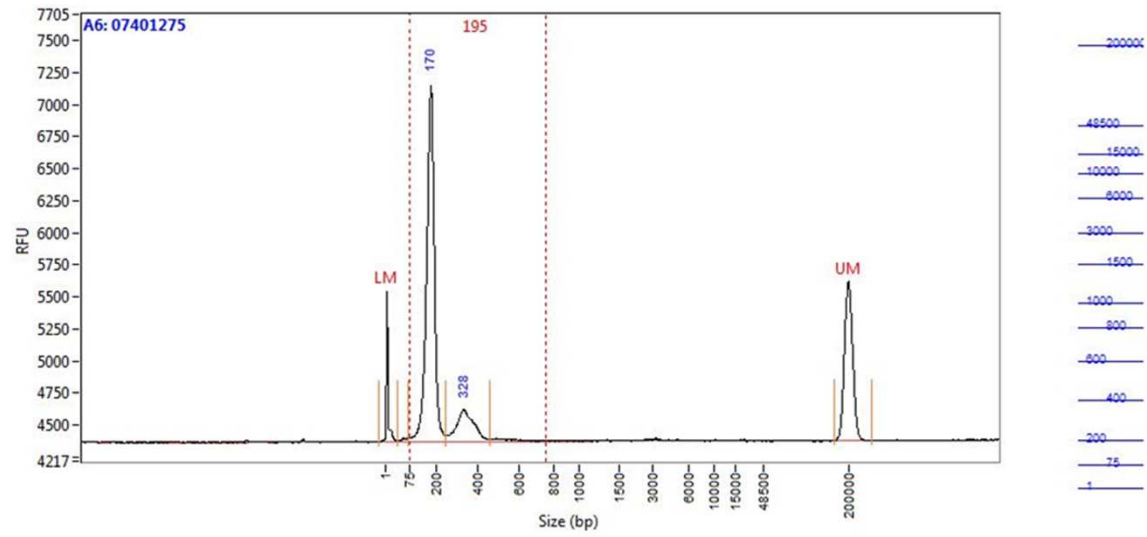

B

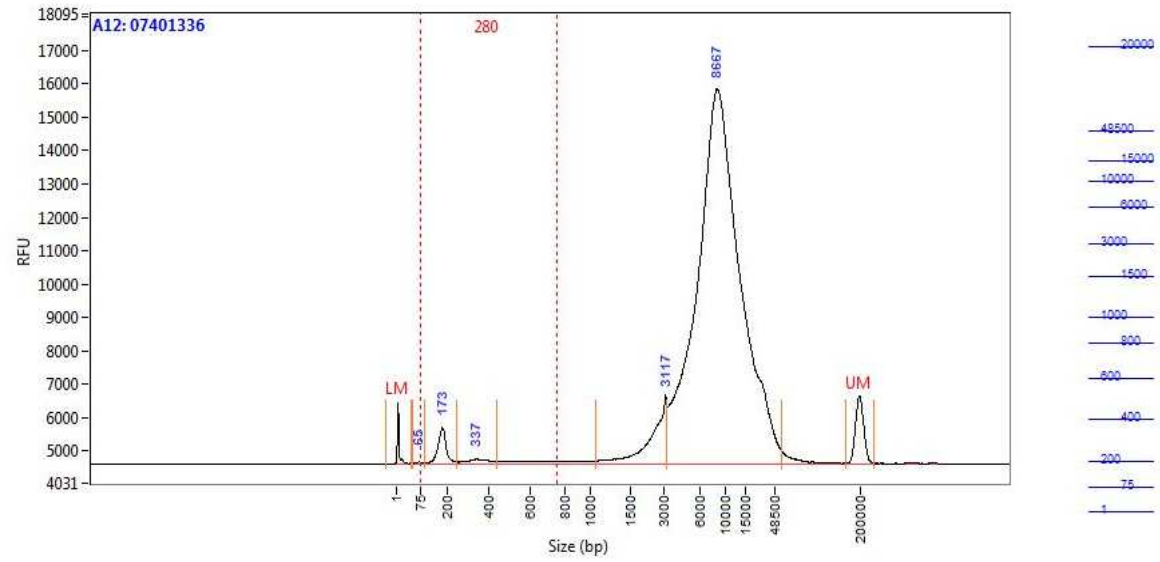

Supplement: 12967_2019_2079_MOESM1_ESM.pdf [file 12967_2019_2079_MOESM1_ESM.pdf]
